# Supplementary figures and images for: Downregulation of LRRC19 Is Associated with Poor Prognosis in Colorectal Cancer
Source: Hindawi journal article supplement (doi:10.1155/2022/5848823), 2022-06-26

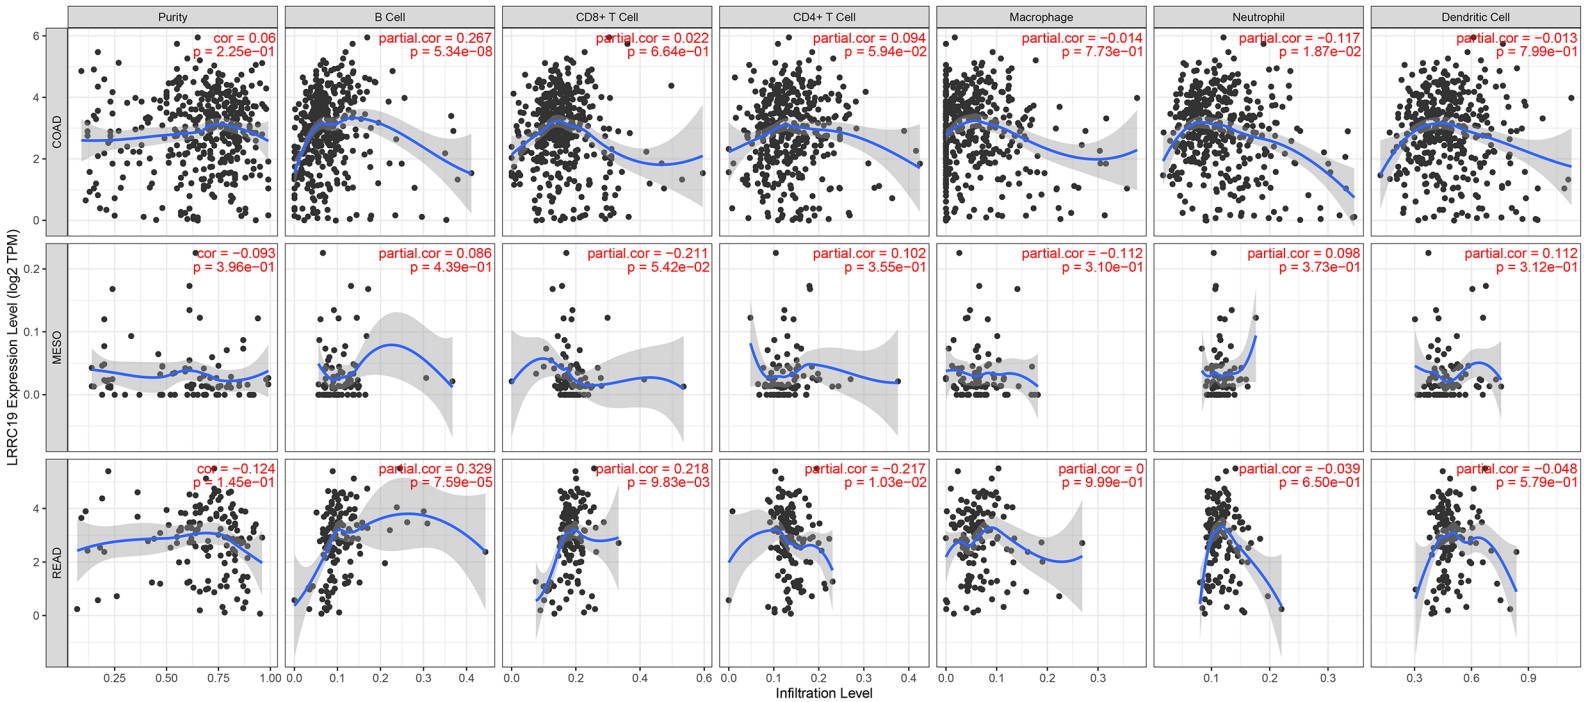

Supplement: f1 [file 5848823.f1.zip]

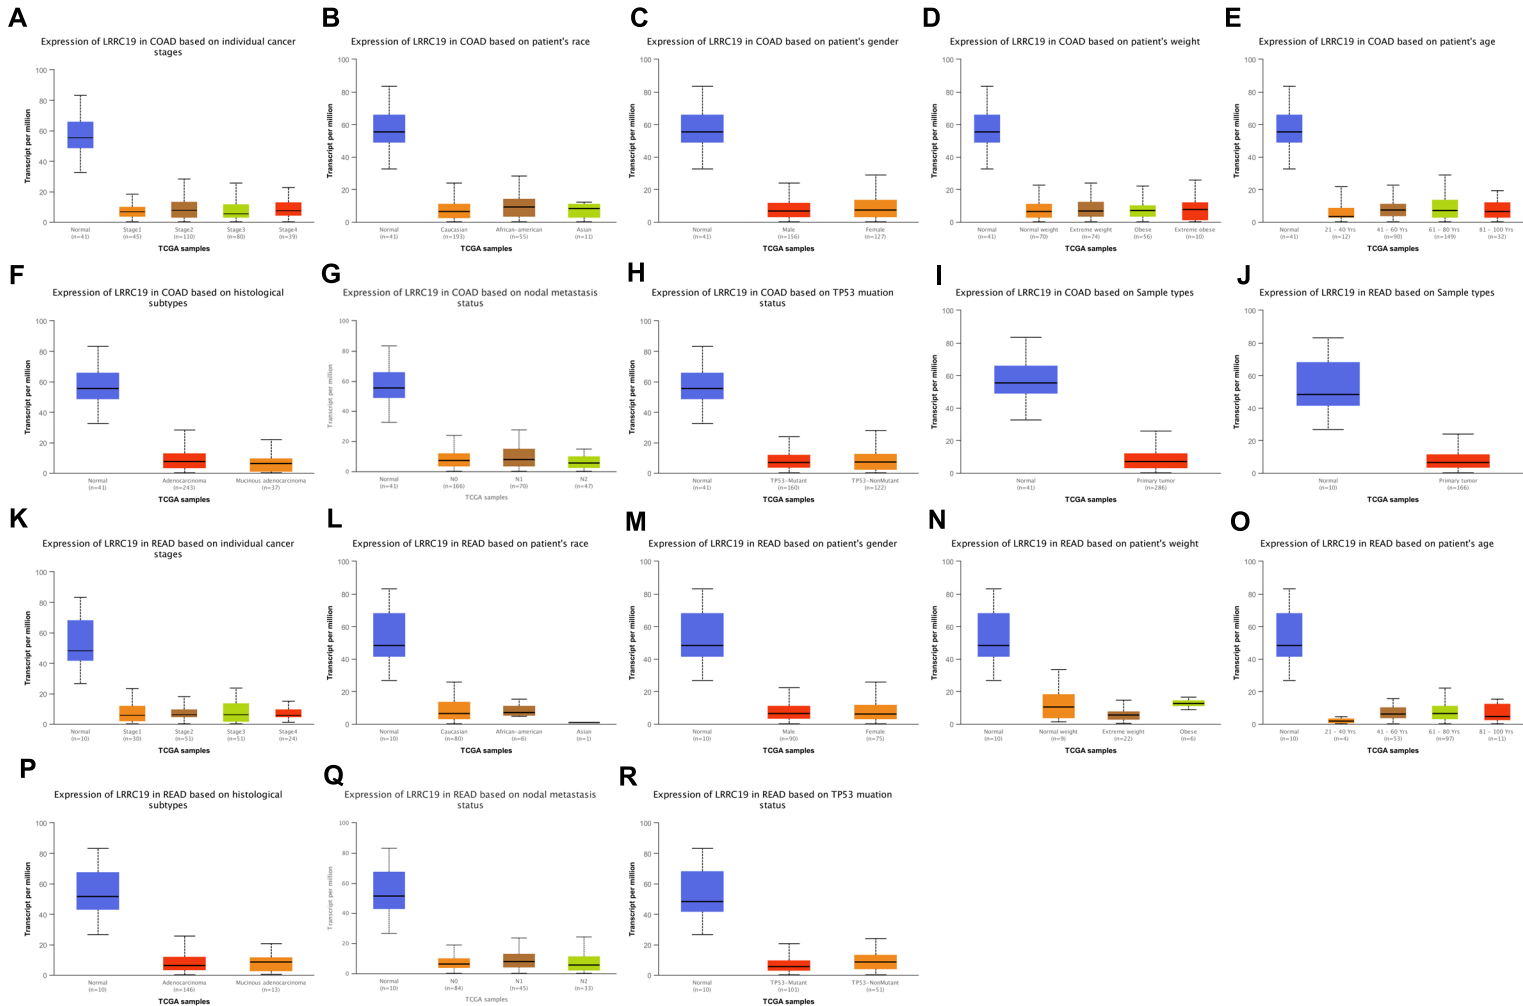

Supplement: f1 [file 5848823.f1.zip]

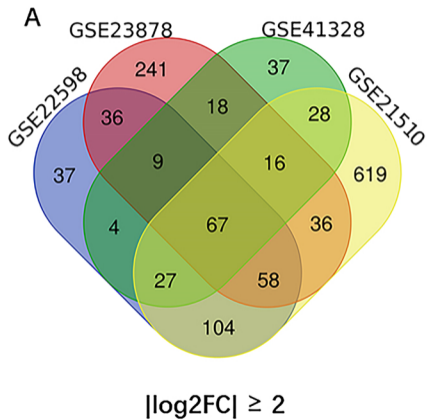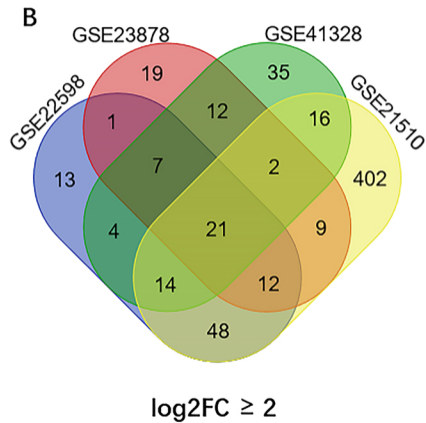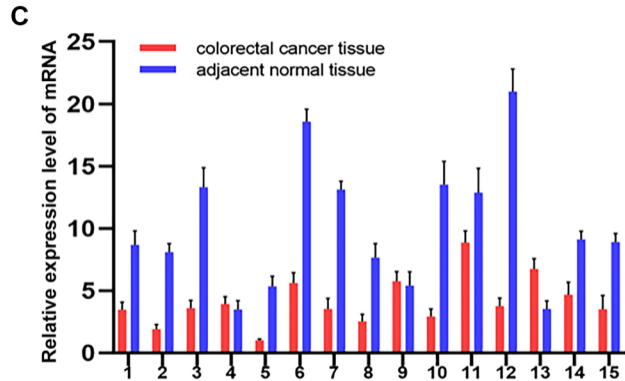

Supplement: f1 [file 5848823.f1.zip]
